# Supplementary material for: Spontaneous Mutation Rate in the Smallest Photosynthetic Eukaryotes
Source: PubMed Central journal article supplement — Mol Biol Evol. 2017 Apr 3;34(7):1770–9. doi: 10.1093/molbev/msx119 (PMC5455958; doi:10.1093/molbev/msx119), 2017-04-03
Supplement: msx119_Supp.pdf [file msx119_Supp.pdf]

## SUPPLEMENTARY MATERIAL

**Table S1.** Summary of mutation accumulation experiments.

**Table S2.** Size of the genome used ( $G^*$ ) for mutations calling.

**Table S3.** Complete list of base-substitution mutations in *O. tauri*.

**Table S4.** Complete list of base-substitution mutations in *O. mediterraneus*.

**Table S5.** Complete list of base-substitution mutations in *B. prasinos*.

**Table S6.** Complete list of base-substitution mutations in *M. pusilla*.

**Table S7.** Complete list of deletions in the four experiments.

**Table S8.** Complete list of insertions in the four experiments.

**Table S9.** RNAseq coverage of exons and non-exonic regions, in mutated and non-mutated sites in *B. prasinos* and *O. tauri*.

**Table S10:** GC bias between coding and intergenic sequences.

**Table S11.** Spontaneous base-substitution mutation rates estimated by mutation accumulation experiments or pedigree sequencing in Bacteria and Eukaryotes.

**Table S12.** Effect of GC departure from equilibrium GC content on the base substitution mutation rate.

**Fig. S1.** Mutation rate as a function of genome size.

**Table S1.**  $N_e$  is the average effective population size during the experiment (estimated as the harmonic mean of cell numbers). Total lines are the number of sequenced lines at the end of the experiment. Total generations are the number of independent generations obtained with all sequenced MA lines.  $T_0$  to  $T_f$  is the duration of the experiment since the inoculation of the MA lines.

| <b>Species</b>                  | <b>Total line</b> | <b>Total generations</b> | <b>Mean generations per MA line</b> | <b><math>N_e</math></b> | <b><math>T_0</math> to <math>T_f</math> (days)</b> |
|---------------------------------|-------------------|--------------------------|-------------------------------------|-------------------------|----------------------------------------------------|
| <i>O. tauri</i> RCC4221         | 40                | 17 250                   | 431                                 | 8.5                     | 378                                                |
| <i>O. mediterraneus</i> RCC2590 | 37                | 8 379                    | 235                                 | 7                       | 294                                                |
| <i>M. pusilla</i> RCC299        | 37                | 4 145                    | 112                                 | 6                       | 299                                                |
| <i>B. prasinos</i> RCC1105      | 36                | 4994                     | 139                                 | 8.5                     | 224                                                |

**Table S2.** Size of the genome used ( $G^*$ ) for mutation calling.  $G^*_{min}$  is the minimum and  $G^*_{max}$  the maximum genome size for each species.

| <b>Species</b>                  | <b>G (Mb)</b> | <b><math>G^*_{average}</math> (%)</b> | <b><math>G^*_{min}</math> (%)</b> | <b><math>G^*_{max}</math> (%)</b> |
|---------------------------------|---------------|---------------------------------------|-----------------------------------|-----------------------------------|
| <i>O. tauri</i> RCC4221         | 13.03         | 12.60 (97.5)                          | 11.82 (91.54)                     | 12.84 (99.45)                     |
| <i>O. mediterraneus</i> RCC2590 | 13.48         | 13.10 (97.2)                          | 12.28 (91.10)                     | 13.35 (99.08)                     |
| <i>B. prasinos</i> RCC1105      | 15.07         | 15.02 (99.6)                          | 14.66 (97.23)                     | 15.03 (99.73)                     |
| <i>M. pusilla</i> RCC299        | 21.11         | 21.01 (99.5)                          | 20.55 (97.36)                     | 21.07 (99.79)                     |

**Table S3.** Complete list of base-substitution mutations in *O. tauri*. Ns: non-synonymous mutation, Syn: synonymous mutations, - : intergenic mutations.

| Chromosome | Position | Reference | Mutation | Effect |
|------------|----------|-----------|----------|--------|
| 1          | 281349   | T         | C        | Syn    |
| 1          | 462543   | T         | A        | -      |
| 1          | 462544   | A         | T        | -      |
| 1          | 536352   | G         | A        | -      |
| 1          | 688195   | A         | G        | -      |
| 1          | 762227   | A         | G        | Ns     |
| 1          | 764912   | G         | A        | -      |
| 1          | 934994   | C         | T        | Syn    |
| 2          | 202377   | C         | A        | Ns     |
| 2          | 744253   | G         | A        | Syn    |
| 2          | 759388   | C         | T        | Ns     |
| 2          | 817108   | C         | T        | Ns     |
| 2          | 820022   | C         | A        | Ns     |
| 2          | 868393   | G         | A        | Syn    |
| 2          | 1070559  | A         | G        | Ns     |
| 3          | 41080    | C         | T        | Syn    |
| 3          | 127716   | G         | A        | Ns     |
| 3          | 210680   | A         | G        | -      |
| 3          | 353325   | C         | T        | Ns     |
| 3          | 379647   | C         | T        | Ns     |
| 3          | 779548   | T         | C        | Syn    |
| 3          | 971494   | C         | T        | Ns     |
| 4          | 117      | C         | A        | -      |
| 4          | 366731   | C         | T        | Syn    |
| 4          | 524836   | G         | A        | Ns     |
| 4          | 735752   | C         | T        | Ns     |
| 5          | 5699     | C         | T        | Ns     |
| 5          | 405535   | G         | A        | Syn    |
| 5          | 498490   | T         | G        | Ns     |
| 5          | 600053   | T         | A        | -      |
| 5          | 600056   | G         | A        | -      |
| 5          | 658543   | G         | A        | Ns     |
| 5          | 668815   | C         | T        | Ns     |
| 6          | 12972    | C         | T        | Ns     |
| 6          | 18960    | C         | T        | -      |
| 6          | 46323    | T         | G        | Ns     |
| 6          | 162319   | T         | C        | Ns     |
| 6          | 334481   | G         | C        | -      |
| 6          | 661927   | C         | T        | -      |
| 6          | 716579   | C         | T        | Ns     |
| 7          | 475871   | A         | G        | Ns     |
| 7          | 612454   | C         | T        | Syn    |
| 7          | 702913   | A         | C        | Ns     |
| 7          | 744212   | G         | A        | Ns     |
| 8          | 66027    | G         | A        | -      |
| 8          | 185592   | G         | C        | -      |
| 9          | 31962    | G         | A        | Ns     |
| 9          | 126121   | C         | T        | Syn    |
| 9          | 393218   | C         | T        | Ns     |

---

|    |        |   |   |             |
|----|--------|---|---|-------------|
| 9  | 398617 | C | T | Syn         |
| 9  | 514297 | C | T | Ns          |
| 9  | 643568 | A | G | Ns          |
| 10 | 108529 | G | A | Ns          |
| 10 | 510428 | C | T | Ns          |
| 10 | 562914 | G | A | Syn         |
| 10 | 587147 | G | A | -           |
| 11 | 222249 | A | G | -           |
| 11 | 446073 | T | C | Syn         |
| 11 | 452825 | C | A | Ns          |
| 11 | 472590 | G | A | Stop gained |
| 11 | 474928 | A | G | -           |
| 12 | 94     | A | G | -           |
| 12 | 419488 | C | A | Ns          |
| 12 | 460233 | T | G | -           |
| 13 | 145936 | G | A | Syn         |
| 13 | 365169 | C | T | Ns          |
| 13 | 496008 | C | T | Ns          |
| 14 | 75583  | G | A | Intron      |
| 14 | 210547 | G | A | Ns          |
| 14 | 231150 | G | T | -           |
| 14 | 257724 | C | A | Ns          |
| 14 | 374547 | G | C | Syn         |
| 14 | 495621 | G | A | Syn         |
| 14 | 500741 | C | T | Ns          |
| 15 | 165137 | C | T | Ns          |
| 15 | 177872 | G | T | Ns          |
| 15 | 352817 | A | G | Syn         |
| 16 | 460708 | C | T | Syn         |
| 16 | 325515 | G | T | Syn         |
| 16 | 521001 | C | T | Ns          |
| 17 | 35411  | T | G | Ns          |
| 17 | 410925 | C | T | -           |
| 17 | 410926 | G | A | -           |
| 17 | 410927 | A | G | -           |
| 17 | 410928 | C | G | -           |
| 18 | 122316 | A | G | -           |
| 18 | 252024 | T | G | -           |
| 18 | 345570 | T | G | -           |
| 18 | 345641 | G | A | -           |
| 20 | 49667  | C | T | Ns          |
| 20 | 165267 | T | G | -           |

---

**Table S4.** Complete list of base-substitution mutations in *O. mediterraneus*. Ns: non-synonymous mutation, Syn: synonymous mutations, - : intergenic mutations.

| Chromosome | Position | Reference | Mutation | Effect |
|------------|----------|-----------|----------|--------|
| 1          | 240410   | T         | C        | Syn    |
| 1          | 281668   | A         | T        | Ns     |
| 1          | 384332   | T         | C        | -      |
| 1          | 500961   | T         | G        | -      |
| 1          | 504598   | G         | A        | -      |
| 1          | 960787   | G         | T        | Ns     |
| 2          | 783209   | C         | A        | Syn    |
| 3          | 168617   | T         | G        | Ns     |
| 3          | 194253   | A         | T        | Ns     |
| 4          | 4863     | A         | G        | Ns     |
| 4          | 250707   | T         | C        | -      |
| 4          | 271238   | A         | G        | -      |
| 4          | 271242   | G         | T        | -      |
| 4          | 271243   | A         | G        | -      |
| 4          | 271249   | A         | C        | -      |
| 4          | 271258   | C         | T        | -      |
| 4          | 271264   | G         | T        | -      |
| 5          | 204024   | G         | A        | Ns     |
| 5          | 237455   | G         | A        | Ns     |
| 5          | 369175   | C         | T        | Ns     |
| 5          | 561353   | C         | A        | Ns     |
| 6          | 167738   | C         | T        | Ns     |
| 6          | 365873   | C         | T        | Syn    |
| 6          | 638629   | C         | A        | Ns     |
| 7          | 136735   | A         | C        | Ns     |
| 7          | 298488   | C         | T        | Ns     |
| 8          | 59263    | G         | A        | Ns     |
| 8          | 106639   | G         | A        | Ns     |
| 8          | 165454   | G         | A        | Syn    |
| 8          | 246199   | T         | C        | Ns     |
| 8          | 285631   | G         | A        | Syn    |
| 8          | 390757   | T         | A        | Ns     |
| 8          | 425236   | T         | G        | Ns     |
| 8          | 437922   | G         | C        | Ns     |
| 8          | 699362   | G         | A        | Syn    |
| 9          | 552630   | G         | T        | Ns     |
| 9          | 701807   | A         | C        | Ns     |
| 9          | 717500   | C         | A        | -      |
| 9          | 737678   | G         | T        | Ns     |
| 10         | 165842   | G         | A        | Ns     |
| 13         | 107450   | T         | C        | Ns     |
| 13         | 162729   | C         | T        | Syn    |

|    |        |   |   |              |
|----|--------|---|---|--------------|
| 13 | 586916 | T | C | Ns           |
| 14 | 60175  | T | A | Ns           |
| 14 | 60217  | G | A | Ns           |
| 14 | 98081  | A | C | Ns           |
| 15 | 112247 | C | A | Start gained |
| 16 | 222414 | C | T | Syn          |
| 16 | 297544 | C | T | Syn          |
| 17 | 368001 | G | T | Ns           |
| 17 | 422490 | C | T | -            |
| 18 | 272777 | A | G | Ns           |
| 18 | 299852 | A | G | Ns           |
| 19 | 81732  | C | G | Ns           |

**Table S5.** Complete list of base-substitution mutations in *B. prasinos*. Ns: non-synonymous mutation, Syn: synonymous mutations, - : intergenic mutations.

| Chromosome | Position | Reference | Mutation | Effect |
|------------|----------|-----------|----------|--------|
| 1          | 42082    | C         | A        | Ns     |
| 1          | 79489    | C         | T        | Syn    |
| 1          | 418914   | T         | G        | Ns     |
| 1          | 1305044  | G         | C        | Syn    |
| 11         | 525583   | C         | T        | Ns     |
| 12         | 50       | T         | A        | -      |
| 12         | 122406   | T         | C        | -      |
| 13         | 208600   | T         | A        | Ns     |
| 17         | 72       | G         | C        | -      |
| 18         | 999      | C         | A        | Ns     |
| 18         | 235306   | T         | G        | -      |
| 19         | 69819    | A         | T        | -      |
| 19         | 145968   | A         | T        | -      |
| 2          | 556426   | G         | C        | Ns     |
| 4          | 135852   | C         | T        | Syn    |
| 4          | 531741   | C         | G        | Ns     |
| 5          | 87328    | C         | T        | Ns     |
| 5          | 145129   | A         | T        | Intron |
| 5          | 602981   | C         | G        | Syn    |
| 5          | 797176   | A         | T        | Ns     |
| 8          | 574299   | C         | A        | Ns     |
| 9          | 93038    | C         | T        | Syn    |

**Table S6.** Complete list of base-substitution mutations in *M. pusilla*. Ns: non-synonymous mutation, Syn: synonymous mutations, - : intergenic mutations.

| Chromosome | Position | Reference | Mutation | Effect |
|------------|----------|-----------|----------|--------|
| 1          | 101651   | G         | T        | -      |
| 1          | 319728   | T         | A        | -      |
| 1          | 319729   | C         | A        | -      |
| 1          | 356850   | G         | C        | Ns     |
| 1          | 868786   | A         | G        | -      |
| 1          | 907594   | A         | G        | -      |
| 1          | 989553   | G         | A        | Ns     |
| 1          | 1166944  | A         | G        | -      |
| 1          | 1311961  | A         | G        | Ns     |
| 1          | 1328941  | C         | T        | -      |
| 1          | 1480609  | A         | C        | -      |
| 1          | 1531771  | T         | C        | -      |
| 1          | 1771291  | T         | C        | -      |
| 2          | 296      | C         | T        | -      |
| 2          | 197240   | G         | C        | Ns     |
| 2          | 318653   | C         | G        | Ns     |
| 2          | 318654   | A         | C        | Ns     |
| 2          | 318655   | G         | C        | Ns     |
| 2          | 371001   | G         | T        | Ns     |
| 2          | 629587   | T         | G        | Ns     |
| 2          | 1231590  | G         | A        | Syn    |
| 2          | 1439488  | C         | T        | Ns     |
| 2          | 1898300  | G         | T        | Syn    |
| 2          | 1898302  | A         | C        | Ns     |
| 2          | 1898303  | C         | A        | Ns     |
| 2          | 1898304  | T         | A        | Ns     |
| 2          | 1898305  | T         | C        | Syn    |
| 3          | 1370371  | C         | G        | Ns     |
| 3          | 1375097  | G         | A        | Ns     |
| 3          | 1708043  | C         | T        | Ns     |
| 4          | 3470     | C         | A        | Syn    |
| 4          | 334275   | G         | A        | Syn    |
| 4          | 571514   | G         | A        | Ns     |
| 4          | 1224092  | G         | A        | Syn    |
| 5          | 486431   | C         | A        | Syn    |
| 5          | 508099   | G         | C        | Syn    |
| 5          | 556716   | C         | G        | Ns     |
| 5          | 896616   | C         | T        | -      |
| 5          | 1108981  | G         | A        | Ns     |
| 6          | 1235633  | G         | A        | Ns     |
| 7          | 570664   | G         | T        | Ns     |

---

|    |         |   |   |     |
|----|---------|---|---|-----|
| 7  | 570665  | A | C | Syn |
| 7  | 570666  | G | T | Ns  |
| 7  | 672236  | G | A | -   |
| 7  | 746112  | G | C | Syn |
| 8  | 93285   | G | T | Ns  |
| 8  | 273349  | C | T | Ns  |
| 8  | 284318  | G | T | Ns  |
| 8  | 303063  | G | A | Syn |
| 8  | 310233  | T | A | Ns  |
| 8  | 310234  | G | C | Ns  |
| 8  | 1077655 | G | T | Ns  |
| 9  | 1126769 | A | T | Syn |
| 11 | 173723  | G | A | -   |
| 11 | 430804  | C | T | Ns  |
| 11 | 899300  | A | G | Ns  |
| 11 | 899309  | G | A | Ns  |
| 12 | 323466  | T | C | Ns  |
| 12 | 797741  | C | T | Syn |
| 12 | 823088  | T | G | Ns  |
| 13 | 688257  | C | G | Syn |
| 14 | 346000  | G | T | Syn |
| 14 | 346390  | G | C | Syn |
| 14 | 761603  | G | A | Ns  |
| 15 | 146889  | A | T | Ns  |
| 15 | 146890  | T | G | Ns  |
| 15 | 320895  | A | G | Syn |
| 15 | 408470  | A | C | -   |
| 15 | 410306  | C | T | Ns  |
| 15 | 504682  | G | T | Ns  |
| 16 | 329517  | C | T | Ns  |

---



**Table S7.** Complete list of deletions in the four species.

| Chromosome                        | Position | Reference                                    | Mutation | Effect          |
|-----------------------------------|----------|----------------------------------------------|----------|-----------------|
| <i>Bathycoccus prasinos</i>       |          |                                              |          |                 |
| 1                                 | 164711   | AGGCGAGCAGTG                                 | A        | -               |
| 1                                 | 164726   | AATTCAATTTCAATA                              | A        | -               |
| 5                                 | 622569   | GA                                           | G        | Frame shift     |
| 5                                 | 963834   | AAATATCTATTG                                 | A        | -               |
| 14                                | 329038   | TG                                           | T        | -               |
| <i>Micromonas pusilla</i>         |          |                                              |          |                 |
| 1                                 | 1787228  | TTATTCCTTCGAAGCTTACGTACG                     | T        | -               |
| 1                                 | 1924354  | CA                                           | C        | Frame shift     |
| 1                                 | 319750   | GTACCTTCGAAGGTATAA                           | G        | -               |
| 3                                 | 214      | CT                                           | C        | -               |
| 5                                 | 140463   | CGCGAGACCTCG                                 | C        | Frame shift     |
| 6                                 | 1235612  | AGGAGGAGGAGGGGGAGGAGGG                       | A        | Codons deletion |
| 8                                 | 310219   | CGATCTGCGTCCGGTG                             | C        | Codons deletion |
| 10                                | 1045182  | GCGC                                         | G        | -               |
| 10                                | 1160336  | TCA                                          | T        | -               |
| 11                                | 899291   | ACAGACGGCACAGCTGGCG                          | A        | Codons deletion |
| 14                                | 474      | AACCCTTCGT                                   | A        | -               |
| 16                                | 287228   | AACTCGAGTTGACAAGACC                          | A        | -               |
| <i>Ostreococcus tauri</i>         |          |                                              |          |                 |
| 1                                 | 601169   | GA                                           | G        | -               |
| 6                                 | 46321    | CT                                           | C        | Frame shift     |
| 8                                 | 273361   | AAC                                          | A        | Frame shift     |
| 8                                 | 72783    | GACACCCGCGTGTACGGGACCGCGACCC                 | G        | -               |
| 11                                | 222762   | GA                                           | G        | Frame shift     |
| 12                                | 403601   | CGCGAGACCGGCGCACATCGCCGTCGTCGCCACCGTCGGAAACT | C        | Frame shift     |
| 13                                | 135      | CA                                           | C        | -               |
| 17                                | 87       | CT                                           | C        | -               |
| <i>Ostreococcus mediterraneus</i> |          |                                              |          |                 |
| 6                                 | 284415   | CG                                           | C        | Frame shift     |
| 7                                 | 156017   | GT                                           | G        | -               |
| 7                                 | 1775     | TGTTGCC                                      | T        | -               |
| 8                                 | 350046   | CGTT                                         | C        | Codons deletion |
| 9                                 | 185017   | CACGGCGACGACGAACGATGGCG                      | C        | Frame shift     |
| 12                                | 567140   | TCG                                          | T        | Frame shift     |
| 12                                | 328305   | GT                                           | G        | -               |
| 13                                | 112767   | ATCTATCGTCGCGACGGCGGTCTCTATG                 | A        | Codons deletion |

**Table S8.** Complete list of insertions in the four species.

| Chromosome                        | Position | Reference | Mutation | Effect           |
|-----------------------------------|----------|-----------|----------|------------------|
| <i>Bathycoccus prasinos</i>       |          |           |          |                  |
| 2                                 | 102      | A         | AC       | -                |
| 9                                 | 521140   | A         | AAG      | -                |
| 13                                | 570953   | T         | TGCC     | Codons insertion |
| 14                                | 272      | A         | ACC      | -                |
| 18                                | 523      | A         | AC       | -                |
| <i>Micromonas pusilla</i>         |          |           |          |                  |
| 1                                 | 319727   | A         | AC       | -                |
| 2                                 | 378439   | C         | CCG      | Frame shift      |
| <i>Ostreococcus tauri</i>         |          |           |          |                  |
| 4                                 | 76071    | C         | CG       | -                |
| 10                                | 455685   | T         | TCGTCCG  | Codons insertion |
| 15                                | 109437   | C         | CG       | -                |
| 17                                | 226384   | C         | CG       | -                |
| 20                                | 153964   | G         | GA       | -                |
| <i>Ostreococcus mediterraneus</i> |          |           |          |                  |
| 1                                 | 384327   | G         | GATT     | -                |
| 8                                 | 729406   | C         | CA       | Frame shift      |
| 12                                | 432782   | C         | CTACTG   | -                |

**Table S9:** RNAseq coverage of coding (cds) and intergenic (non-cds) sequences, in mutated and non-mutated sites in *B. prasinos* and *O. tauri*. The removal of the 10 mutations located in the subtelomeric regions does not change the significance of the transcription bias (Wilcoxon test, P-value=0.016).

| Species                     | Sequence types | <i>n</i> mutations | Mutated site coverage | Non-mutated site coverage | P. value Wilcoxon test |
|-----------------------------|----------------|--------------------|-----------------------|---------------------------|------------------------|
| <i>Bathycoccus prasinos</i> | non-cds        | 13                 | 247                   | 646                       | 0.0004                 |
|                             | cds            | 19                 | 505                   | 667                       | 0.123                  |
| <i>Ostreococcus tauri</i>   | non-cds        | 38                 | 26                    | 149                       | $3.45 \times 10^{-7}$  |
|                             | cds            | 64                 | 127                   | 126                       | 0.382                  |

**Table S10:** GC bias between coding and intergenic sequences. Data from *B. prasinos* are not presented because of low number of mutations.

| Species                 | Coding sequences    |                     |                                     | Intergenic sequences |                     |                                     |
|-------------------------|---------------------|---------------------|-------------------------------------|----------------------|---------------------|-------------------------------------|
|                         | <i>n</i> (GC to AT) | <i>n</i> (AT to GC) | $\mu$ (GC to AT) / $\mu$ (AT to GC) | <i>n</i> (GC to AT)  | <i>n</i> (AT to GC) | $\mu$ (GC to AT) / $\mu$ (AT to GC) |
| <i>O. tauri</i>         | 48                  | 13                  | 2.57                                | 12                   | 11                  | 0.76                                |
| <i>O. mediterraneus</i> | 24                  | 12                  | 1.57                                | 6                    | 6                   | 0.79                                |
| <i>M. pusilla</i>       | 30                  | 11                  | 1.43                                | 7                    | 7                   | 0.79                                |

**Table S11.** Spontaneous base-substitution mutation rates estimated by mutation accumulation experiments and pedigree.  $G$  is the genome size in Mb,  $\mu$  is the mutation rate per nucleotide and  $U$  is the number of mutations per genome per generation. The data from Ness et al. (2015) is the average of 6 strains. Effective population size come from Lynch supplementary material (Lynch 2010), except for *Mus musculus* (Phifer-Rixey et al. 2012), *Heliconius melpomene* (Keightley, Pinharanda, et al. 2014), *Ficedula albicollis* (Backström et al. 2013), *Arabidopsis thaliana* (Cao et al. 2011), *Caenorhabditis elegans* (Cutter 2006), *Caenorhabditis briggsae* (Cutter et al. 2006), *Drosophila melanogaster* (Shapiro et al. 2007) and *O. tauri* (Romain Blanc-Mathieu, personal communication).

| Species                           | G      | $\mu$    | U       | Ne       | References                           |
|-----------------------------------|--------|----------|---------|----------|--------------------------------------|
| <i>Homo sapiens</i>               | 3309.0 | 1.29E-08 | 38.5500 | 2.00E+04 | (Besenbacher et al. 2016)            |
| <i>Mus musculus</i>               | 2671.0 | 5.40E-09 | 14.5800 | 2.00E+05 | (Uchimura et al. 2015)               |
| <i>Ficedula albicollis</i>        | 1118.0 | 4.60E-09 | 5.0600  | 4.50E+05 | (Smeds et al. 2016)                  |
| <i>Arabidopsis thaliana</i>       | 134.4  | 7.00E-09 | 1.0990  | 2.50E+05 | (Ossowski et al. 2010)               |
| <i>Caenorhabditis elegans</i>     | 100.3  | 1.48E-09 | 0.1479  | 8.00E+04 | (Denver et al. 2012)                 |
| <i>Caenorhabditis briggsae</i>    | 108.4  | 1.34E-09 | 0.1447  | 6.00E+04 | (Denver et al. 2012)                 |
| <i>Pristionchus pacificus</i>     | 133.1  | 2.00E-09 | 0.2663  | -        | (Weller et al. 2014)                 |
| <i>Drosophila melanogaster</i>    | 148.0  | 5.49E-09 | 0.6698  | 1.15E+06 | (Schridder et al. 2013)              |
| <i>Heliconius melpomene</i>       | 273.8  | 2.90E-09 | 0.7940  | 2.00E+06 | (Keightley, Pinharanda, et al. 2014) |
| <i>Daphnia pulex</i>              | 197.2  | 2.30E-09 | 0.4536  | -        | (Flynn et al. 2016)                  |
| <i>Ostreococcus tauri</i>         | 13.0   | 4.19E-10 | 0.0054  | 2.00E+07 | This study                           |
| <i>Ostreococcus mediterraneus</i> | 13.5   | 4.92E-10 | 0.0065  | -        | This study                           |
| <i>Bathycoccus prasinos</i>       | 15.1   | 3.07E-10 | 0.0046  | -        | This study                           |
| <i>Micromonas pusilla</i>         | 21.1   | 8.15E-10 | 0.0172  | -        | This study                           |
| <i>Chlamydomonas reinhardtii</i>  | 112.0  | 9.63E-10 | 0.1079  | 3.10E+07 | (Ness et al. 2015)                   |
| <i>Saccharomyces cerevisiae</i>   | 12.3   | 1.67E-10 | 0.0021  | 6.20E+06 | (Zhu et al. 2014)                    |
| <i>Schizoaccharomyces pombe</i>   | 12.6   | 2.00E-10 | 0.0025  | 2.60E+06 | (Farlow et al. 2015)                 |
| <i>Paramecium tetraurelia</i>     | 72.1   | 1.94E-11 | 0.0014  | 1.24E+08 | (Sung, Tucker, et al. 2012)          |
| <i>Tetrahymena thermophila</i>    | 104.0  | 7.61E-12 | 0.0008  | 1.12E+08 | (Long et al. 2016)                   |
| <i>Dictyostelium discoideum</i>   | 34.2   | 2.90E-11 | 0.0010  | -        | (Saxer et al. 2012)                  |
| <i>Bacillus subtilis</i>          | 4.2    | 3.28E-10 | 0.0014  | 6.30E+07 | (Sung et al. 2015)                   |
| <i>Escherichia coli</i>           | 4.6    | 2.20E-10 | 0.0010  | 1.80E+08 | (Lee et al. 2012)                    |
| <i>Mesoplasma florum</i>          | 0.8    | 9.78E-09 | 0.0078  | 1.10E+06 | (Sung, Ackerman, et al. 2012)        |
| <i>Burkholderia cenocepacia</i>   | 7.7    | 1.33E-10 | 0.0010  | -        | (Dillon et al. 2015)                 |
| <i>Pseudomonas aeruginosa</i>     | 6.6    | 7.92E-11 | 0.0005  | 2.00E+07 | (Dettman et al. 2016)                |
| <i>Salmonella typhimurium</i>     | 4.8    | 7.00E-10 | 0.0034  | -        | (Lind and Andersson 2008)            |
| <i>Mycobacterium tuberculosis</i> | 4.4    | 2.58E-10 | 0.0011  | -        | (Ford et al. 2011)                   |
| <i>Deinococcus radiodurans</i>    | 3.2    | 4.99E-10 | 0.0016  | -        | (Long et al. 2015)                   |
| <i>Vibrio cholerae</i>            | 4.02   | 1.07E-10 | 0.00043 | -        | (Dillon et al. 2016)                 |
| <i>Vibrio fischeri</i>            | 4.23   | 2.07E-10 | 0.00089 | -        | (Dillon et al. 2016)                 |

**Table S12.** Effect of GC deviation from equilibrium GC content on the base substitution mutation rate.  $R_1$ ,  $R_2$ ,  $R_3$  and  $R_4$  (see methods) were used to calculate  $GC_{eq}$  and mutation rate at equilibrium  $\mu_{eq}$ . The ratio  $\mu/\mu_{eq}$  is an estimation of the elevation of the mutation rate due to the distance from equilibrium GC content, *i.e.* in *O. tauri* the mutation rate increases by ~12%. We only included  $\mu_{eq}$  estimated from more than 8 mutation events per category to avoid spurious variance in  $GC_{eq}$  estimates.

| Species                           | $\mu_{bs}$ | GC    | $GC_{eq}$ | $GC_r$ | GC>AT relative to AT>GC | $\mu/\mu_{eq}$ | References                |
|-----------------------------------|------------|-------|-----------|--------|-------------------------|----------------|---------------------------|
| <i>Homo sapiens</i>               | 1.29E-08   | 0.415 | 0.326     | 1.272  | 2.064                   | 1.106          | (Besenbacher et al. 2016) |
| <i>Mus musculus</i>               | 5.40E-09   | 0.424 | 0.207     | 2.051  | 3.842                   | 1.295          | (Uchimura et al. 2015)    |
| <i>Ficedula albicollis</i>        | 4.60E-09   | 0.443 | 0.311     | 1.426  | 2.219                   | 1.116          | (Smeds et al. 2016)       |
| <i>Arabidopsis thaliana</i>       | 7.00E-09   | 0.367 | 0.138     | 2.663  | 6.255                   | 1.640          | (Ossowski et al. 2010)    |
| <i>Daphnia pulex</i>              | 2.30E-09   | 0.422 | 0.141     | 2.997  | 6.101                   | 1.629          | (Flynn et al. 2016)       |
| <i>Caenorhabditis elegans</i>     | 1.48E-09   | 0.354 | 0.193     | 1.837  | 4.189                   | 1.225          | (Denver et al. 2012)      |
| <i>Caenorhabditis briggsae</i>    | 1.34E-09   | 0.377 | 0.211     | 1.784  | 3.732                   | 1.227          | (Denver et al. 2012)      |
| <i>Pristionchus pacificus</i>     | 2.00E-09   | 0.427 | 0.157     | 2.711  | 5.350                   | 1.381          | (Weller et al. 2014)      |
| <i>Drosophila melanogaster</i>    | 5.49E-09   | 0.419 | 0.188     | 2.228  | 4.318                   | 1.324          | (Schridder et al. 2013)   |
| <i>Ostreococcus tauri</i>         | 4.19E-10   | 0.590 | 0.365     | 1.615  | 1.737                   | 1.118          | This study                |
| <i>Ostreococcus mediterraneus</i> | 3.73E-10   | 0.560 | 0.433     | 1.293  | 1.310                   | 1.017          | This study                |
| <i>Micromonas pusilla</i>         | 8.15E-10   | 0.638 | 0.462     | 1.382  | 1.166                   | 1.030          | This study                |
| <i>Chlamydomonas reinhardtii</i>  | 9.63E-10   | 0.619 | 0.259     | 2.392  | 2.864                   | 1.428          | (Ness et al. 2015)        |
| <i>Saccharomyces cerevisiae</i>   | 1.67E-10   | 0.384 | 0.311     | 1.235  | 2.216                   | 1.067          | (Zhu et al. 2014)         |
| <i>Schizosaccharomyces pombe</i>  | 2.00E-10   | 0.360 | 0.264     | 1.364  | 2.790                   | 1.122          | (Farlow et al. 2015)      |
| <i>Bacillus subtilis</i>          | 3.28E-10   | 0.437 | 0.443     | 0.986  | 1.256                   | 0.999          | (Sung et al. 2015)        |
| <i>Escherichia coli</i>           | 2.20E-10   | 0.506 | 0.450     | 1.124  | 1.222                   | 1.010          | (Lee et al. 2012)         |
| <i>Mesoplasma florum</i>          | 9.78E-09   | 0.270 | 0.059     | 4.582  | 15.970                  | 2.628          | (Sung et al. 2012a)       |
| <i>Burkholderia cenocepacia</i>   | 1.33E-10   | 0.669 | 0.551     | 1.213  | 0.814                   | 0.978          | (Dillon et al. 2015)      |
| <i>Pseudomonas aeruginosa</i>     | 7.92E-11   | 0.662 | 0.396     | 1.671  | 1.524                   | 1.083          | (Dettman et al. 2016)     |
| <i>Deinococcus radiodurans</i>    | 4.99E-10   | 0.668 | 0.643     | 1.039  | 0.555                   | 0.983          | (Long et al. 2015)        |
| <i>Vibrio cholerae</i>            | 1.07E-10   | 0.476 | 0.281     | 1.694  | -                       | -              | (Dillon et al. 2016)      |
| <i>Vibrio fischeri</i>            | 2.07E-10   | 0.384 | 0.202     | 1.901  | -                       | -              | (Dillon et al. 2016)      |

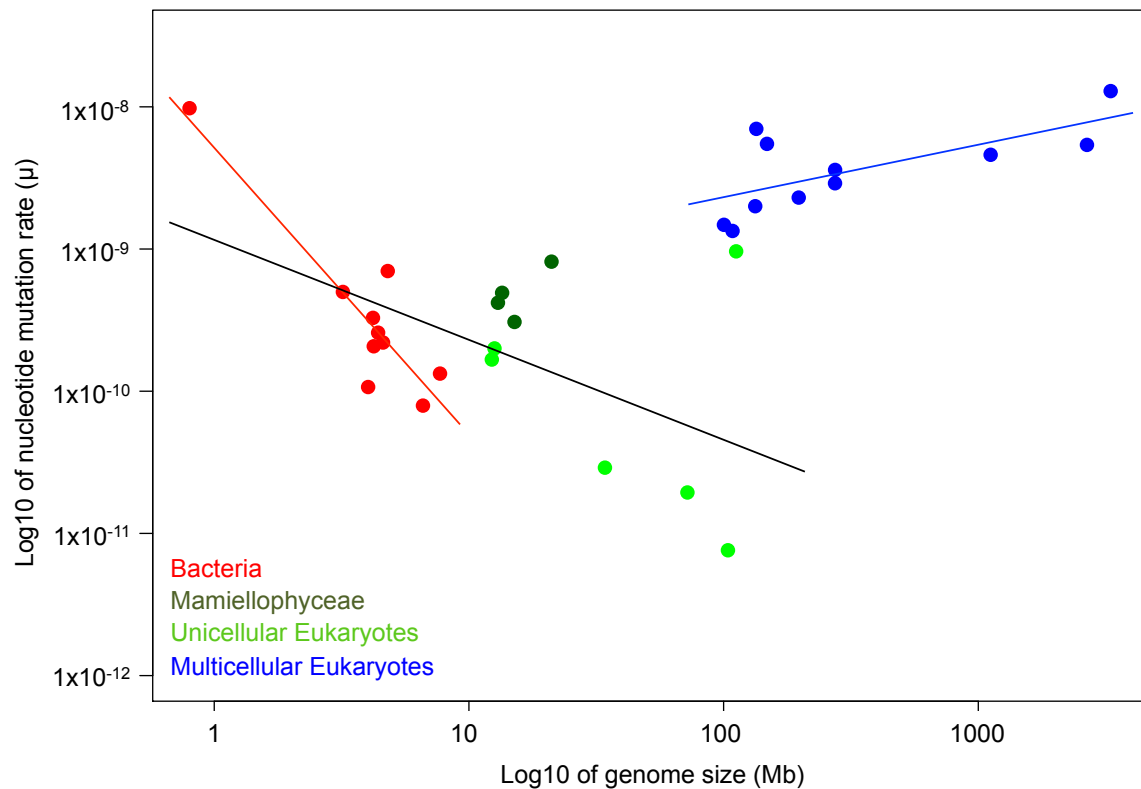

**Fig. S1.** Mutation rate as a function of genome size  $G$  (data available Table S11). *Blue*: positive correlation between  $\mu$  and  $G$  in multicellular eukaryotes ( $n=10$ , Pearson correlation,  $\rho=0.67$ ,  $P$ -value $<0.03$ ). *Black*: negative correlation between  $\mu$  and  $G$  in microorganisms ( $n=19$ , Pearson correlation,  $\rho=-0.57$ ,  $P$ -value $=0.01$ ). *Red*: negative correlation between  $\mu$  and  $G$  in bacteria ( $n=10$ , Pearson correlation,  $\rho=-0.95$ ,  $P$ -value $=0.001$ ).

## References

- Backström N, Sætre G-P, Ellegren H. 2013. Inferring the demographic history of European *Ficedula* flycatcher populations. *BMC Evol. Biol.* 13:2.
- Besenbacher S, Sulem P, Helgason A, Helgason H, Kristjansson H, Jonasdottir A, Jonasdottir A, Magnusson OT, Thorsteinsdottir U, Masson G, et al. 2016. Multi-nucleotide de novo Mutations in Humans. *PLoS Genet.* 12:e1006315.
- Cao J, Schneeberger K, Ossowski S, Günther T, Bender S, Fitz J, Koenig D, Lanz C, Stegle O, Lippert C, et al. 2011. Whole-genome sequencing of multiple *Arabidopsis thaliana* populations. *Nat. Genet.* 43:956–963.
- Cutter AD. 2006. Nucleotide polymorphism and linkage disequilibrium in wild populations of the partial selfer *Caenorhabditis elegans*. *Genetics* 172:171–184.

- Cutter AD, Félix M-A, Barrière A, Charlesworth D. 2006. Patterns of Nucleotide Polymorphism Distinguish Temperate and Tropical Wild Isolates of *Caenorhabditis briggsae*. *Genetics* 173:2021–2031.
- Denver DR, Wilhelm LJ, Howe DK, Gafner K, Dolan PC, Baer CF. 2012. Variation in base-substitution mutation in experimental and natural lineages of *Caenorhabditis nematodes*. *Genome Biol. Evol.* 4:513–522.
- Dettman JR, Sztepanacz JL, Kassen R. 2016. The properties of spontaneous mutations in the opportunistic pathogen *Pseudomonas aeruginosa*. *BMC Genomics* [Internet] 17. Available from: <http://www.ncbi.nlm.nih.gov/pmc/articles/PMC4702332/>
- Dillon MM, Sung W, Lynch M, Cooper VS. 2015. The Rate and Molecular Spectrum of Spontaneous Mutations in the GC-Rich Multi-Chromosome Genome of *Burkholderia cenocepacia*. *Genetics*.
- Dillon MM, Sung W, Sebra R, Lynch M, Cooper VS. 2016. Genome-wide biases in the rate and molecular spectrum of spontaneous mutations in *Vibrio cholerae* and *Vibrio fischeri*. *Mol. Biol. Evol.*:msw224.
- Farlow A, Long H, Arnoux S, Sung W, Doak TG, Nordborg M, Lynch M. 2015. The Spontaneous Mutation Rate in the Fission Yeast *Schizosaccharomyces pombe*. *Genetics:genetics.115.177329*.
- Flynn JM, Chain FJJ, Schoen DJ, Cristescu ME. 2016. Spontaneous mutation accumulation in *Daphnia pulex* in selection-free versus competitive environments. *Mol. Biol. Evol.*:msw234.
- Ford CB, Lin PL, Chase MR, Shah RR, Iartchouk O, Galagan J, Mohaideen N, Ioerger TR, Sacchettini JC, Lipsitch M, et al. 2011. Use of whole genome sequencing to estimate the mutation rate of *Mycobacterium tuberculosis* during latent infection. *Nat. Genet.* 43:482–486.
- Keightley PD, Pinharanda A, Ness RW, Simpson F, Dasmahapatra KK, Mallet J, Davey JW, Jiggins CD. 2014. Estimation of the spontaneous mutation rate in *Heliconius melpomene*. *Mol. Biol. Evol.*
- Lee H, Popodi E, Tang H, Foster PL. 2012. Rate and molecular spectrum of spontaneous mutations in the bacterium *Escherichia coli* as determined by whole-genome sequencing. *Proc. Natl. Acad. Sci. U. S. A.* 109:E2774-2783.
- Lind PA, Andersson DI. 2008. Whole-genome mutational biases in bacteria. *Proc. Natl. Acad. Sci. U. S. A.* 105:17878–17883.

- Long H, Kucukyildirim S, Sung W, Williams E, Lee H, Ackerman M, Doak TG, Tang H, Lynch M. 2015. Background Mutational Features of the Radiation-Resistant Bacterium *Deinococcus radiodurans*. *Mol. Biol. Evol.* 32:2383–2392.
- Long H, Winter DJ, Chang AY-C, Sung W, Wu SH, Balboa M, Azevedo RBR, Cartwright RA, Lynch M, Zufall RA. 2016. Low base-substitution mutation rate in the germline genome of the ciliate *Tetrahymena thermophila*. *Genome Biol. Evol.*:evw223.
- Lynch M. 2010. Evolution of the mutation rate. *Trends Genet.* TIG 26:345–352.
- Ness RW, Morgan AD, Vasanthakrishnan RB, Colegrave N, Keightley PD. 2015. Extensive de novo mutation rate variation between individuals and across the genome of *Chlamydomonas reinhardtii*. *Genome Res.* 25:1739–1749.
- Ossowski S, Schneeberger K, Lucas-Lledó JI, Warthmann N, Clark RM, Shaw RG, Weigel D, Lynch M. 2010. The rate and molecular spectrum of spontaneous mutations in *Arabidopsis thaliana*. *Science* 327:92–94.
- Phifer-Rixey M, Bonhomme F, Boursot P, Churchill GA, Piálek J, Tucker PK, Nachman MW. 2012. Adaptive Evolution and Effective Population Size in Wild House Mice. *Mol. Biol. Evol.* 29:2949–2955.
- Saxer G, Havlak P, Fox SA, Quance MA, Gupta S, Fofanov Y, Strassmann JE, Queller DC. 2012. Whole genome sequencing of mutation accumulation lines reveals a low mutation rate in the social amoeba *Dictyostelium discoideum*. *PLoS One* 7:e46759.
- Schrider DR, Houle D, Lynch M, Hahn MW. 2013. Rates and genomic consequences of spontaneous mutational events in *Drosophila melanogaster*. *Genetics* 194:937–954.
- Shapiro JA, Huang W, Zhang C, Hubisz MJ, Lu J, Turissini DA, Fang S, Wang H-Y, Hudson RR, Nielsen R, et al. 2007. Adaptive genic evolution in the *Drosophila* genomes. *Proc. Natl. Acad. Sci. U. S. A.* 104:2271–2276.
- Smeds L, Qvarnstrom A, Ellegren H. 2016. Direct estimate of the rate of germline mutation in a bird. *Genome Res.*
- Sung W, Ackerman MS, Gout J-F, Miller SF, Williams E, Foster PL, Lynch M. 2015. Asymmetric Context-Dependent Mutation Patterns Revealed through Mutation–Accumulation Experiments. *Mol. Biol. Evol.* 32:1672–1683.
- Sung W, Ackerman MS, Miller SF, Doak TG, Lynch M. 2012. Drift-barrier hypothesis and mutation-rate evolution. *Proc. Natl. Acad. Sci. U. S. A.* 109:18488–18492.

Sung W, Tucker AE, Doak TG, Choi E, Thomas WK, Lynch M. 2012. Extraordinary genome stability in the ciliate *Paramecium tetraurelia*. *Proc. Natl. Acad. Sci. U. S. A.* 109:19339–19344.

Uchimura A, Higuchi M, Minakuchi Y, Ohno M, Toyoda A, Fujiyama A, Miura I, Wakana S, Nishino J, Yagi T. 2015. Germline mutation rates and the long-term phenotypic effects of mutation accumulation in wild-type laboratory mice and mutator mice. *Genome Res.* 186148.114

Weller AM, Rödelberger C, Eberhardt G, Molnar RI, Sommer RJ. 2014. Opposing Forces of A/T-Biased Mutations and G/C-Biased Gene Conversions Shape the Genome of the Nematode *Pristionchus pacificus*. *Genetics* 196:1145–1152.

Zhu YO, Siegal ML, Hall DW, Petrov DA. 2014. Precise estimates of mutation rate and spectrum in yeast. *Proc. Natl. Acad. Sci. U. S. A.* 111:E2310-2318.
